# Supplementary material for: The Structure of Genealogies in the Presence of Purifying Selection: A Fitness-Class Coalescent
Source: Oxford University Press journal article supplement (doi:10.1534/genetics.111.134544), 2011-12-02
Supplement: 0753_files2.pdf [file 0753_files2.pdf]

FILE S2: THE NON-CONDITIONAL DISTRIBUTIONS OF MUTANT TIMINGS

Within the non-conditional approximation we need to calculate the distribution of mutant timings, as used in Eq. (48). Specifically, we need to calculate

$$Q_k^{k-\ell}(t) = Q_k^{k-1}(t) \star Q_{k-1}^{k-2}(t) \star Q_{k-2}^{k-3}(t) \star \dots \star Q_{k-\ell+1}^{k-\ell}(t), \quad (\text{S.17})$$

where  $\star$  refers to a convolution and

$$Q_{k-\ell+1}^{k-\ell}(t) = s(k-\ell+1)e^{-s(k-\ell+1)t}, \quad (\text{S.18})$$

as given by Eq. (6). In general, the convolution of  $n$  exponential distributions with parameters  $\lambda_1 \dots \lambda_n$  is given by

$$\sum_{i=0}^{n-1} \lambda_i e^{-\lambda_i t} \prod_{j=0, \neq i}^{n-1} \frac{\lambda_j}{\lambda_j - \lambda_i}. \quad (\text{S.19})$$

Applying this identity with  $\lambda_i = s(k-i)$ , we find

$$Q_k^{k-\ell}(t) = \sum_{i=0}^{\ell-1} s e^{-s(k-i)t} \left( \frac{\prod_{j=0}^{\ell-1} (k-j)}{\prod_{j=0, \neq i}^{\ell-1} (i-j)} \right) \quad (\text{S.20})$$

We can simplify this expression by noting that

$$\prod_{j=0}^{\ell-1} (k-j) = \frac{k!}{(k-\ell)!}, \quad (\text{S.21})$$

and similarly that

$$\prod_{j=0, \neq i}^{\ell-1} (i-j) = i!(\ell-1-i)!(-1)^{\ell-1-i}. \quad (\text{S.22})$$

This means we have

$$Q_k^{k-\ell}(t) = \sum_{i=0}^{\ell-1} s \ell e^{-s(k-i)t} (-1)^{\ell-i-1} \binom{\ell-1}{i} \binom{k}{k-\ell}. \quad (\text{S.23})$$

We can evaluate this sum by recognizing the binomial expansion formula

$$(1+x)^n = \sum_{i=0}^n x^i \binom{n}{i}, \quad (\text{S.24})$$

where we identify  $x = -e^{st}$ . We find

$$Q_k^{k-\ell}(t) = s \ell \binom{k}{\ell} e^{-s \ell t} (e^{st} - 1)^{\ell-1}. \quad (\text{S.25})$$

More generally, we have

$$Q_a^b(t) = s(a-b) \binom{a}{b} e^{-sat} (e^{st} - 1)^{a-b-1}. \quad (\text{S.26})$$
