# Supplementary material for: The Structure of Genealogies in the Presence of Purifying Selection: A Fitness-Class Coalescent
Source: Oxford University Press journal article supplement (doi:10.1534/genetics.111.134544), 2011-12-02
Supplement: 0753_files3.pdf [file 0753_files3.pdf]

FILE S3: GENERAL COALESCENCE PROBABILITIES IN THE NON-CONDITIONAL APPROXIMATION

The probability of coalescence for two individuals originally in two different classes  $k$  and  $k'$ , as defined in Eq. (48) can be rewritten as

$$P_c^{k,k' \rightarrow k' - \ell} = \frac{1}{1 + 2Nh_{k-\ell}s(k-\ell)} [I_1 + I_2], \quad (\text{S.27})$$

where we have defined

$$I_1 = \int_0^\infty Q_{k'}^{k-\ell}(t_1) e^{-s(k-\ell)t_1} \int_0^{t_1} Q_k^{k-\ell}(t_2) e^{s(k-\ell)t_2} dt_2 dt_1 \quad (\text{S.28})$$

$$I_2 = \int_0^\infty Q_k^{k-\ell}(t_2) e^{-s(k-\ell)t_2} \int_0^{t_2} Q_{k'}^{k-\ell}(t_1) e^{s(k-\ell)t_1} dt_1 dt_2. \quad (\text{S.29})$$

Note that both  $I_1$  and  $I_2$  involve integrals of the form

$$I_a = \int_0^t Q_a^b(t') e^{sbt'} dt'. \quad (\text{S.30})$$

Plugging in the results for the non-conditional distributions of mutant timings, Eq. (S.26), and making use of the binomial expansion formula for  $(1+x)^n$  noted in File S2, we find this integral becomes

$$I_a = s(a-b) \binom{a}{b} \int_0^t e^{s(b-a)t'} (e^{st'} - 1)^{a-b-1} dt' \quad (\text{S.31})$$

$$= s(a-b) \binom{a}{b} \sum_{i=0}^{a-b-1} (-1)^{a-b-1+i} \binom{a-b-1}{i} \int_0^t e^{s(b-a+i)t'} dt' \quad (\text{S.32})$$

$$= (a-b) \binom{a}{b} (-1)^{a-b} \sum_{i=0}^{a-b-1} \frac{(-1)^i}{a-b} \binom{a-b}{i} (e^{s(b-a+i)t} - 1) \quad (\text{S.33})$$

$$= \binom{a}{b} (-1)^{a-b} \sum_{i=0}^{a-b} (-1)^i \binom{a-b}{i} (e^{s(b-a+i)t} - 1) \quad (\text{S.34})$$

$$= \binom{a}{b} (-1)^{a-b} e^{s(b-a)t} \sum_{i=0}^{a-b} (-e^{st})^i \binom{a-b}{i} \quad (\text{S.35})$$

$$= \binom{a}{b} e^{s(b-a)t} (e^{st} - 1)^{a-b}. \quad (\text{S.36})$$

We now substitute this result for  $I_a$  into our expressions for  $I_1$  and  $I_2$ . We note that both have terms of the form

$$I_b = \int_0^\infty Q_a^b(t) \binom{c}{b} e^{-sct} (e^{st} - 1)^{c-b} dt. \quad (\text{S.37})$$

Using similar manipulations to those above, we find

$$I_b = (a-b) \binom{a}{b} \binom{c}{b} \int_0^\infty e^{-s(a+c)t} (e^{st} - 1)^{a+c-2b-1} dt \quad (\text{S.38})$$

$$= s(a-b) \binom{a}{b} \binom{c}{b} (-1)^{a+c-1} \sum_{i=0}^{a+c-2b-1} \binom{a+c-2b-1}{i} (-1)^i \int_0^\infty e^{-s(a+c-i)t} dt \quad (\text{S.39})$$

$$= (a-b) \binom{a}{b} \binom{c}{b} (-1)^{a+c-1} \sum_{i=0}^{a+c-2b-1} (-1)^i \binom{a+c-2b-1}{i} \frac{1}{a+c-i}. \quad (\text{S.40})$$

Using the partial fraction decomposition

$$\frac{1}{\binom{n+x}{n}} = \sum_{i=1}^n (-1)^{i-1} \binom{n}{i} \frac{i}{x+i}, \quad (\text{S.41})$$

we find

$$I_b = \frac{\frac{a-b}{a+c-2b} \binom{a}{b} \binom{c}{b} (-1)^{a+c}}{\binom{-2b-1}{a+c-2b}} = \frac{\frac{a-b}{a+c-2b} \binom{a}{b} \binom{c}{b} (-1)^{2b}}{\binom{a+c}{a+c-2b}}. \quad (\text{S.42})$$

We can now use this result for  $I_b$  to determine  $I_1$  and  $I_2$ , and hence compute  $P_c^{k,k' \rightarrow k' - \ell}$ . We find

$$P_c^{k,k' \rightarrow k' - \ell} = \frac{1}{1 + 2Nh_{k-\ell}s(k-\ell)} \frac{\binom{k'}{k-\ell} \binom{k}{k-\ell}}{\binom{k+k'}{2\ell+k'-k}}. \quad (\text{S.43})$$

As we noted in the main text, this is just

$$P_c^{k,k' \rightarrow k - \ell} = \frac{1}{1 + 2Nh_{k-\ell}s(k-\ell)} A_\ell^{k,k'}, \quad (\text{S.44})$$

with  $A_\ell^{k,k'}$  as defined in Eq. (16). Note that when  $k = k'$ , this result simplifies to  $P_c^{k,k \rightarrow k - \ell}$  as defined in the main text, as expected.
