# Supplementary material for: The Structure of Genealogies in the Presence of Purifying Selection: A Fitness-Class Coalescent
Source: Oxford University Press journal article supplement (doi:10.1534/genetics.111.134544), 2011-12-02
Supplement: 0753_files4.pdf [file 0753_files4.pdf]

FILE S4: COMPUTING SUMS OF ANCESTRAL PATHS

In this Supplementary File, we describe the calculation of  $\phi_k^{k'}(\ell)$  using the sum of ancestral paths approach.

**Calculation of  $\phi_k^k(3)$ :** We begin by considering a simpler specific case, where  $k = k'$  and  $\ell = 3$ . There are a total of  $\binom{6}{3} = 20$  possible ancestral paths by which two individuals sampled from class  $k$  can coalesce in class  $k - 3$ . These can be separated into four types, according to whether the two ancestral lineages were ever together in classes  $k - 1$  or  $k - 2$ . We can list all paths of each type, using the notation that A is a mutation event in the first lineage, and B is a mutation event in the second lineage. We have

$$\underbrace{\begin{pmatrix} ABABAB \\ ABABBA \\ ABBAAB \\ ABBABA \\ BAABAB \\ BAABBA \\ BABAAB \\ BABABA \end{pmatrix}}_{\binom{2}{1}\binom{2}{1}\binom{2}{1}=8 \text{ ways}} \quad \underbrace{\begin{pmatrix} ABAABB \\ ABBBAA \\ BAAABB \\ BABBAA \end{pmatrix}}_{\binom{2}{1}(\binom{4}{2}-\binom{2}{1}\binom{2}{1})=4 \text{ ways}} \quad \underbrace{\begin{pmatrix} AABBBAB \\ AABBBBA \\ BBAAAB \\ BBAAABA \end{pmatrix}}_{\binom{2}{1}(\binom{4}{2}-\binom{2}{1}\binom{2}{1})=4 \text{ ways}} \quad \underbrace{\begin{pmatrix} AAABBB \\ AABABB \\ BBBAAA \\ BBABAA \end{pmatrix}}_{\binom{6}{3}-\text{others}=4 \text{ ways}}.$$

The probabilities of all paths of a particular type are identical. We can calculate the probability of each of the four types of paths using the same logic as outlined in the main text. We find

$$P(AAABBBc) = I_x^{k-3} \frac{k(k-1)(k-2)}{8(2k-1)(2k-3)(2k-5)} (1 - I_x^k), \quad (\text{S.45})$$

$$P(AABBBABc) = I_x^{k-3} \frac{k(k-1)(k-2)}{8(2k-1)(2k-3)(2k-5)} (1 - I_x^k) (1 - I_x^{k-1}), \quad (\text{S.46})$$

$$P(ABAABBBc) = I_x^{k-3} \frac{k(k-1)(k-2)}{8(2k-1)(2k-3)(2k-5)} (1 - I_x^k) (1 - I_x^{k-2}), \quad (\text{S.47})$$

$$P(ABABABc) = I_x^{k-3} \frac{k(k-1)(k-2)}{8(2k-1)(2k-3)(2k-5)} (1 - I_x^k) (1 - I_x^{k-1}) (1 - I_x^{k-2}). \quad (\text{S.48})$$

Summing over all the possible paths, we find

$$\phi_k^k(3) = I_{k-3} \frac{\binom{k}{k-3}\binom{k}{k-3}}{\binom{2k}{6}} \left[ 1 - \frac{\binom{2}{1}\binom{4}{2}}{\binom{6}{3}} I_{k-1} - \frac{\binom{2}{1}\binom{4}{2}}{\binom{6}{3}} I_{k-2} + \frac{\binom{2}{1}\binom{2}{1}\binom{2}{1}}{\binom{6}{3}} I_{k-1} I_{k-2} \right]. \quad (\text{S.49})$$

We now pause to consider the form of the probabilities of each type of ancestral path. These probabilities differ only by factors of  $(1 - I_x^{k-i})$ . One such factor arises each time the two ancestral lineages are together in class  $k - i$ . In other words, we can rewrite the probability of each path as the probability of an undistorted path (defined to be a path in which the contributions due to the possibility of coalescence in previous classes

are neglected), times a correction for each class in which the two lineages are together:

$$P(AAABBBc) = P(\text{Undistorted Path}) (1 - I_x^k) \quad (\text{S.50})$$

$$P(AABBABc) = P(\text{Undistorted Path}) (1 - I_x^k) (1 - I_x^{k-1}) \quad (\text{S.51})$$

$$P(ABAABBC) = P(\text{Undistorted Path}) (1 - I_x^k) (1 - I_x^{k-2}) \quad (\text{S.52})$$

$$P(ABABABc) = P(\text{Undistorted Path}) (1 - I_x^k) (1 - I_x^{k-1}) (1 - I_x^{k-2}). \quad (\text{S.53})$$

By definition, the ‘‘undistorted path’’ probability is the probability neglecting the contributions due to the possibility of coalescence in previous steps, and is therefore the same for all paths. We have

$$P(\text{Undistorted Path}) = \frac{k(k-1)(k-2)k(k-1)(k-2)}{2k(2k-1)(2k-2)(2k-3)(2k-4)(2k-5)} I_x^{k-\ell} \quad (\text{S.54})$$

$$= \frac{\frac{k!}{(k-3)!} \frac{k!}{(k-3)!}}{\frac{2k!}{(2k-6)!}} I_x^{k-\ell}. \quad (\text{S.55})$$

Using these results, we can write  $\phi_k^k(3)$  as

$$\begin{aligned} \phi_k^k(3) = & [\# \text{ of Paths}] P(\text{Undistorted Path}) [F_k(1 - I_x^k) + F_{k,k-1}(1 - I_x^k)(1 - I_x^{k-1}) \\ & + F_{k,k-2}(1 - I_x^k)(1 - I_x^{k-2}) + F_{k,k-1,k-2}(1 - I_x^k)(1 - I_x^{k-1})(1 - I_x^{k-2})], \end{aligned} \quad (\text{S.56})$$

where we have defined  $F_{\{a\}}$  to be the fraction of paths that are together in the set of classes  $\{a\}$  (and are not together in any other class).

**Calculation of  $\phi_{k'}^k(\ell)$ :** We now use this approach to calculate the coalescence probability in the general case. The probability of any particular ancestral path from  $k$  and  $k'$  to  $k - \ell$  is the product of the individual probabilities of each mutational step that makes up this path. Each such individual probability consists of three parts: a numerator, which depends only on the current class of the lineage that mutates, divided by a denominator, which depends only on the sum of the current set of classes for both lineages, times a correction factor of  $(1 - I_x^{k-i})$  if the two lineages are in the same class at that step.

Although in each ancestral path the mutations will occur in a different order, all paths will ultimately consist of the same set of mutations ( $k' \rightarrow k' - 1 \rightarrow \dots \rightarrow k - \ell$  and  $k \rightarrow k - 1 \rightarrow \dots \rightarrow k - \ell$ ). Therefore, regardless of the path taken, the product of the numerators from each step will be identical. Similarly, the sum of the current set of classes will begin at  $k' + k$ , and decrement by one each time a deleterious mutation occurs, until both lineages are in the final class ( $k' + k \rightarrow k' + k - 1 \rightarrow \dots \rightarrow 2k - 2\ell$ ). Therefore, regardless of the path taken, the product of the denominators from each step will also be identical. Therefore, the paths will differ only by the correction factor  $(1 - I_x^{k-i})$  for each class in which the two ancestral lineages are together. This means that, analogous to the case of  $\phi_k^k(3)$  we described above, the probability of each

path is the probability of an “undistorted path” times the appropriate correction factor. The probability of the undistorted path is

$$P(\text{Undistorted Path}) = \frac{k'(k' - 1) \dots (k - \ell + 1)k(k - 1) \dots (k - \ell + 1)}{(k' + k)(k' + k - 1) \dots (2k - 2\ell + 1)} I_x^{k-\ell}. \quad (\text{S.57})$$

We can now sum up all possible paths to obtain

$$\begin{aligned} \phi_{k'}^k(\ell) = & [\# \text{ of Paths}] P(\text{Undistorted Path}) \left[ F_\emptyset + \sum_{i=0}^{\ell} F_{k-i} (1 - I_x^{k-i}) \right. \\ & + \sum_{i=0}^{\ell-1} \sum_{j>i}^{\ell} F_{k-i, k-j} (1 - I_x^{k-i}) (1 - I_x^{k-j}) \\ & \left. + \sum_{i=0}^{\ell-2} \sum_{j>i}^{\ell-1} \sum_{m>j}^{\ell} F_{k-i, k-j, k-m} (1 - I_x^{k-i}) (1 - I_x^{k-j}) (1 - I_x^{k-m}) + \dots \right], \end{aligned} \quad (\text{S.58})$$

where as before  $F_{\{a\}}$  is the fraction of paths that are together in the set of classes  $\{a\}$  (and are not together in any other class). Note that there are a total of  $\ell + 1$  terms in this equation, representing the possibility that the two lineages can be together in anywhere from 0 to  $\ell$  of the classes. We can rearrange these terms to write

$$\begin{aligned} \phi_{k'}^k(\ell) = & [\# \text{ of Paths}] P(\text{Undistorted Path}) \left[ 1 - \sum_{i=0}^{\ell} G_{k-i} I_x^{k-i} \right. \\ & + \sum_{i=0}^{\ell-1} \sum_{j>i}^{\ell} G_{k-i, k-j} I_x^{k-i} I_x^{k-j} \\ & \left. - \sum_{i=0}^{\ell-2} \sum_{j>i}^{\ell-1} \sum_{m>j}^{\ell} G_{k-i, k-j, k-m} I_x^{k-i} I_x^{k-j} I_x^{k-m} + \dots \right], \end{aligned} \quad (\text{S.59})$$

where we have defined  $G_{\{a\}}$  to be the fraction of paths that are together in *at least* the set of classes  $\{a\}$ .

We can evaluate each of these factors of  $G$ . For example, the fraction of paths that are together in class  $k - i$  equals the number of ways for the two lineages to descend from classes  $k'$  and  $k$  to be together in class  $k - i$ ,  $\binom{k' - k + 2i}{i}$ , times the number of ways for the two lineages to descend from class  $k - i$  to be together in class  $k - \ell$ ,  $\binom{2i - 2\ell}{i - \ell}$ , divided by the total number of ways for the two lineages to descend from classes  $k'$  and  $k$  to be together in  $k - \ell$ ,  $\binom{k' - k + 2\ell}{\ell}$ . Using this logic, we find

$$\begin{aligned} \phi_{k'}^k(\ell) = & [\# \text{ of Paths}] P(\text{Undistorted Path}) \\ & \times \left[ 1 - \sum_{i=0}^{\ell-1} \frac{\binom{k' - k + 2i}{i} \binom{2\ell - 2i}{\ell - i}}{\binom{k' - k + 2\ell}{\ell}} I_x^{k-i} + \sum_{i=0}^{\ell-2} \sum_{j>i}^{\ell-1} \frac{\binom{k' - k + 2i}{i} \binom{2j - 2i}{j - i} \binom{2\ell - 2j}{\ell - j}}{\binom{k' - k + 2\ell}{\ell}} I_x^{k-i} I_x^{k-j} \dots \right]. \end{aligned} \quad (\text{S.60})$$

The total number of paths is  $\binom{k' - k + 2\ell}{\ell}$ , so we finally find that the full probability of coalescence in class

$k - \ell$  is

$$\begin{aligned} \phi_k^{k'}(\ell) = & I_x^{k-\ell} \frac{\binom{k'}{k-\ell} \binom{k}{k-\ell}}{\binom{k'+k}{k'-k+2\ell}} \left[ 1 - \sum_{i=0}^{\ell-1} \frac{\binom{k'-k+2i}{i} \binom{2\ell-2i}{\ell-i}}{\binom{k'-k+2\ell}{\ell}} I_x^{k-i} + \right. \\ & \left. \sum_{i=0}^{\ell-2} \sum_{j>i}^{\ell-1} \frac{\binom{k'-k+2i}{i} \binom{2j-2i}{j-i} \binom{2\ell-2j}{\ell-j}}{\binom{k'-k+2\ell}{\ell}} I_x^{k-i} I_x^{k-j} - \dots \right]. \end{aligned} \quad (\text{S.61})$$

This is Eq. (56) from the main text. Note that it equals our non-conditional result for  $P_c^{k,k' \rightarrow \ell}$  times a correction factor. There are a total of  $\ell + 1$  terms in this correction factor. This full correction factor can be arbitrarily complex for large  $\ell$ , so we do not write out a general form here. However, it is straightforward to calculate for any values of  $k$ ,  $k'$ , and  $\ell$ ; a Mathematica script to do so is available on request.
